# Supplementary material for: Naringin protects against anoxia/reoxygenation-induced apoptosis in H9c2 cells via the Nrf2 signaling pathway
Source: Royal Society of Chemistry journal article supplement (doi:10.1039/c4fo01164c), 2015-01-01
Supplement: c4fo01164c1.pdf [file c4fo01164c1.pdf]

### Supplemental Material

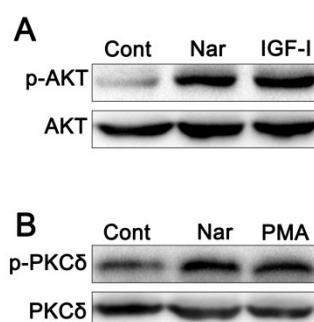

Figure S1 Effects of Nar on the phosphorylation of AKT and PKC $\delta$  in H9c2 cells. The H9c2 cells were incubated with Nar (40  $\mu$ g/ml) for 6 h, IGF-I (1  $\mu$ g/ml) for 30 min, or PMA (10 ng/ml) for 30 min. (A) Immunoblot analysis for phosphorylation of AKT in H9c2 cells. (B) Immunoblot analysis for the phosphorylation of PKC in H9c2 cells.
